# Supplementary material for: Whole-transcriptome splicing profiling of E7.5 mouse primary germ layers reveals frequent alternative promoter usage during mouse early embryogenesis
Source: PubMed Central journal article supplement (PMC5898269; doi:10.1242/bio.032508), 2018-03-15
Supplement: biolopen-7-032508-s1.pdf [file biolopen-7-032508-s1.pdf]

## SUPPLEMENTAL FIGURES

### Supplementary Figure S1

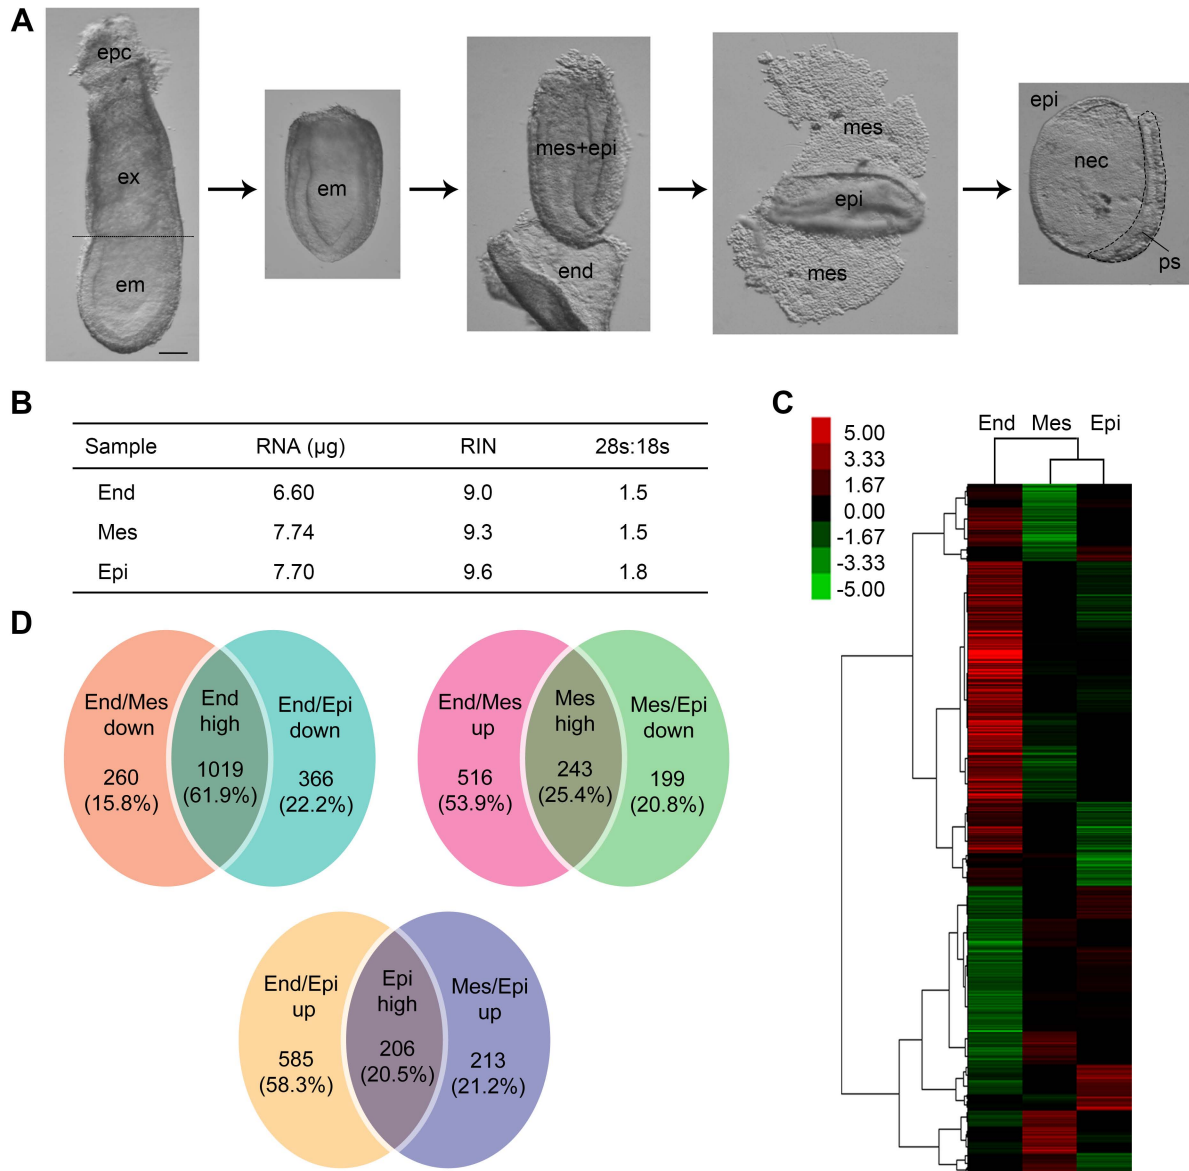

**Supplementary Figure S1. Transcriptome profiling of the three embryonic germ layers of E7.5 mouse embryos. Related to Figure 1.**

(A) Schematic overview of the dissection of the three germ layers. The embryonic region was first separated from the extra-embryonic region. Then the embryonic endoderm, mesoderm and epiblast (neuroectoderm and primitive streak) were dissected carefully in sequence with mouth pipette and glass needles. epc, ectoplacental cone; ex, extra-embryonic region; em, embryonic region; end, endoderm; mes, mesoderm; epi, epiblast; nec, neuroectoderm; ps, primitive streak. The primitive streak was encircled with dotted line. Scale bar, 100  $\mu$ m. (B) The amount and quality of RNAs of each germ layer. RIN, RNA integrity number. (C) The heat map of 2880 genes differentially expressed in the three germ layers of E7.5 mouse embryos. (D) Venn diagram showing genes highly expressed in each germ layer. Genes down-regulated in mesoderm when comparing endoderm and mesoderm (End/Mes down), and simultaneously down-regulated in epiblast when comparing endoderm and epiblast (End/Epi down) are regarded as with high expression level in endoderm (End high); genes up-regulated in mesoderm when comparing endoderm and mesoderm (End/Mes up), and simultaneously down-regulated in epiblast when comparing mesoderm and epiblast (Mes/Epi down) are regarded highly expressed in mesoderm (Mes high); genes up-regulated in epiblast when comparing endoderm and epiblast (End/Epi up), and simultaneously up-regulated in epiblast when comparing mesoderm and epiblast (Mes/Epi up) are regarded as with highly expressed in epiblast (Epi high).

### Supplementary Figure S2

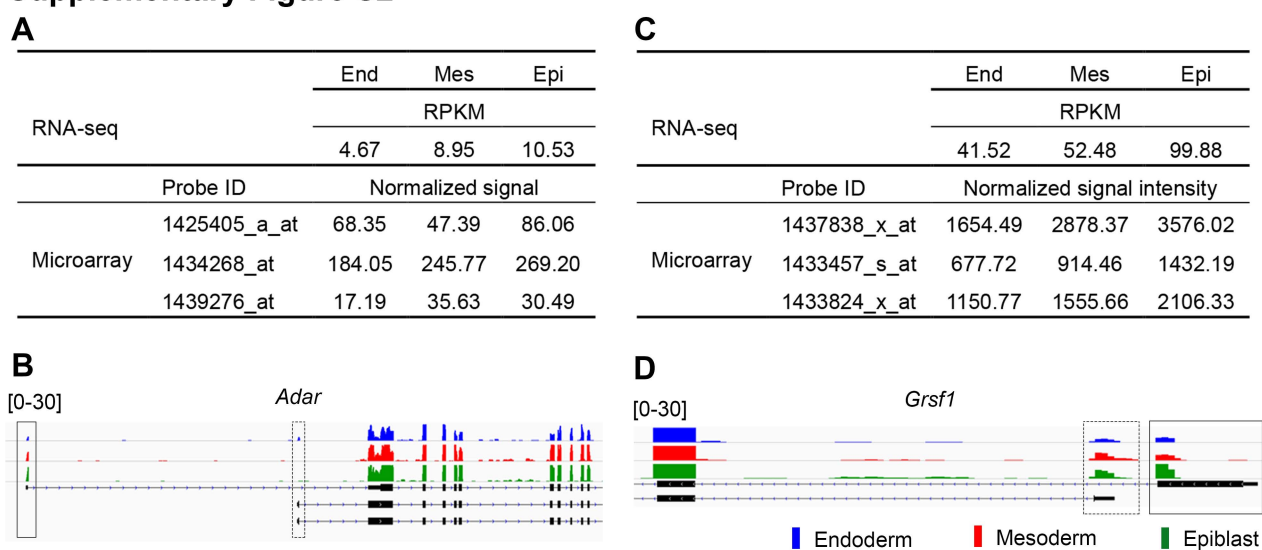

**Supplementary Figure S2. ADAR and GRSF1 are differentially expressed and alternatively spliced across the germ layers. Related to Figure 4.**

(A) The RPKM value and normalized signal intensity of *Adar* in the RNA-seq and Microarray data, respectively. Three probes were used in the Microarray analysis to detect *Adar*. End, endoderm; Mes, mesoderm; Epi, epiblast. (B) The differential AS events of *Adar* between the three germ layers visualized using IGV software with RNA-seq mapped reads. The positions of the proximal and distal promoters are labeled by dotted and solid boxes, respectively. The colored peaks in each case represent the cover heights of the position. (C and D) Same as A and B, except the gene is *Grsf1*.

**Supplementary Figure S3**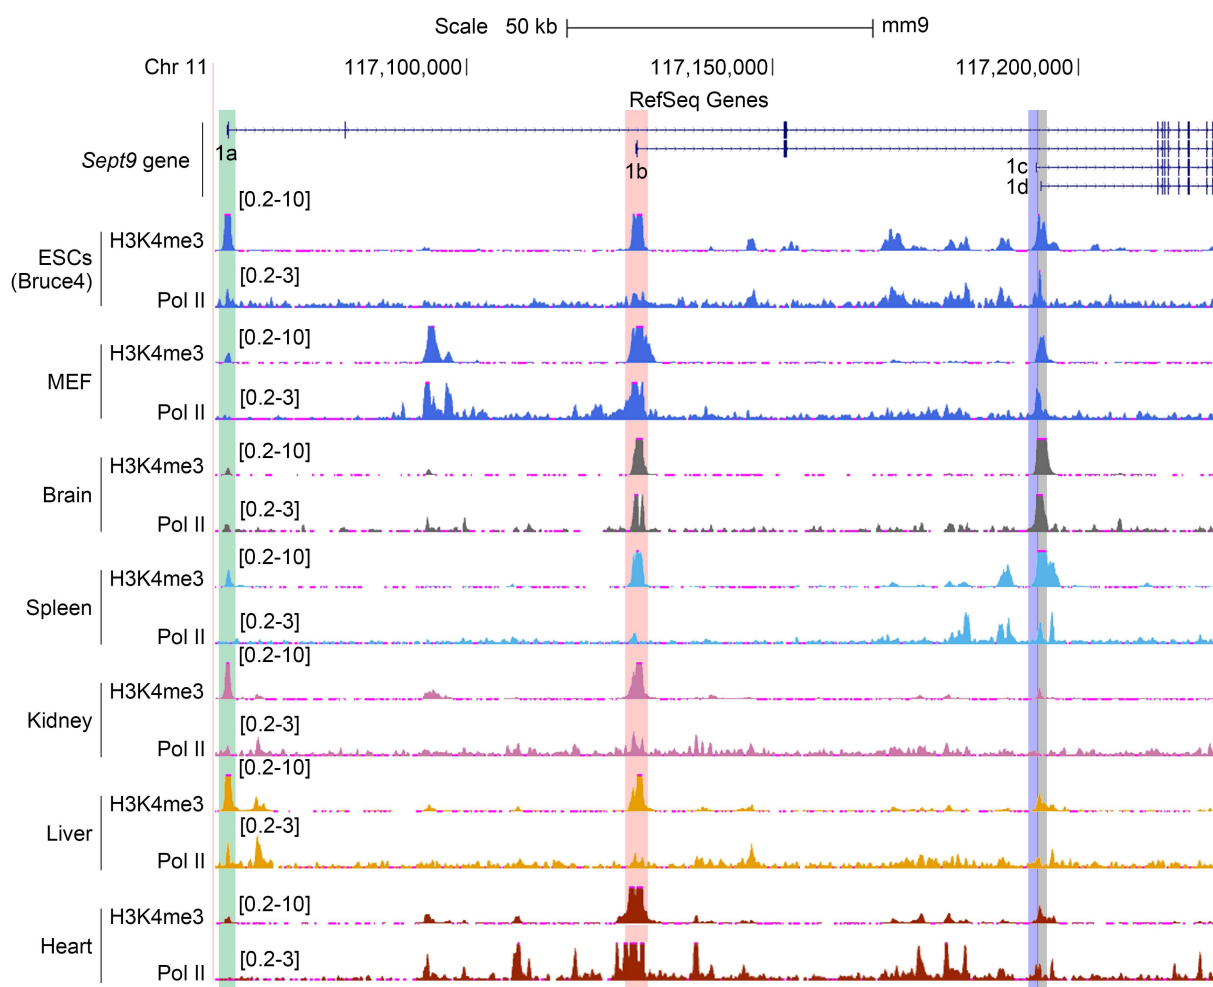

**Supplementary Figure S3. Differential modification of H3K4me3 and binding of RNA polymerase II (Pol II) at the alternative promoters of *Sept9* in different cell lines and tissues.** Data are extracted from UCSC (<http://genome.ucsc.edu/>). The regions of promoters are highlighted in different colors.

## Supplementary Table S1: Gene list

[Click here to Download Table S1](#)

## Supplementary Table S2. RNA-seq data mapping results.

| Sample               | Endoderm         | Mesoderm         | Ectoderm         |
|----------------------|------------------|------------------|------------------|
| Clean reads          | 49744660 (100%)  | 49753030 (100%)  | 51036608 (100%)  |
| Total mapped reads   | 41988506 (84.4%) | 42140982 (84.7%) | 43225419 (84.7%) |
| Unique mapped        | 37188205 (74.8%) | 36384199 (73.1%) | 36965503 (72.4%) |
| Multiple mapped      | 4800301 (9.7%)   | 5756783 (11.6%)  | 6259916 (12.3%)  |
| Total unmapped reads | 7756154 (15.6%)  | 7612048 (15.3%)  | 7811189 (15.3%)  |

**Supplementary Table S3. Primers used for quantitative real-time PCR**

| Genes           | Direction | Sequence (5' to 3')   |
|-----------------|-----------|-----------------------|
| <i>Ash2l-1a</i> | F         | ATGAAGGAGGAGGCCAGGAC  |
|                 | R         | CCGCCTGGGTATCCATCAC   |
| <i>Ash2l-1b</i> | F         | GAGGACCGAGAGACAGAGCC  |
|                 | R         | AGTTTGCATCCCCACTTTTCG |
| <i>Ash2l-t</i>  | F         | TGGGCGGGAAAGCCTATT    |
|                 | R         | CACGGTCAGCCGGTCATC    |
| <i>Ldha-1a</i>  | F         | GGCCACGCTGCTTCTCCT    |
|                 | R         | TTGTTCTGGGGAGCCTGCT   |
| <i>Ldha-1b</i>  | F         | GCGGCTACACGTACACGGA   |
|                 | R         | TTGTTCTGGGGAGCCTGCT   |
| <i>Ldha-t</i>   | F         | TGTTGGGGTTGGTGCTGTT   |
|                 | R         | TCATCTCGCCCTTGAGTTTG  |
| <i>Sept9-1a</i> | F         | GGCGGCACCATGAAGAAGT   |
|                 | R         | GAGTTGGGCGGCTCAATCT   |
| <i>Sept9-1b</i> | F         | ACCAGCCACCATGTCCGA    |
|                 | R         | GAGTTGGGCGGCTCAATCT   |
| <i>Sept9-1c</i> | F         | CAGGCAGCCCCGACTTTCA   |
|                 | R         | GATCCCCACATAGCCGAACTC |
| <i>Sept9-1d</i> | F         | CAGCCAGCAGAGCCCACTT   |
|                 | R         | GATCCCCACATAGCCGAACTC |
| <i>Sept9-t</i>  | F         | GGGCAGCGACCATGAGTATC  |
|                 | R         | GGAGATCCCGCAGGTAAGC   |
| <i>Ube2i-1a</i> | F         | GCCGCACAGGGGTTTCAG    |
|                 | R         | GGTCCTTCCTCCAGGCTTTC  |
| <i>Ube2i-1b</i> | F         | CTAAGTTCCGGGGATCGTCA  |
|                 | R         | GGCACAGGCTCTGGAGGTATC |
| <i>Ube2i-1c</i> | F         | GGAGGGAAGTCCCGAGACAA  |
|                 | R         | GGTCCTTCCTCCAGGCTTTC  |

|                 |   |                          |
|-----------------|---|--------------------------|
| <i>Ube2i-t</i>  | F | TCATCCAAACGTGTATCCTTCTG  |
|                 | R | CTTGTGCTCGGACCCTTTTCT    |
| <i>Uhrf1-1a</i> | F | CTCACGCGGCTCCCTTCT       |
|                 | R | TCTCCTTCCCATCCATAGTTTCG  |
| <i>Uhrf1-1b</i> | F | CCAGGGTCTGTGTCCCGAG      |
|                 | R | TCTCCTTCCCATCCATAGTTTCG  |
| <i>Uhrf1-t</i>  | F | CCACACCGTGA ACTCTCTGTC   |
|                 | R | GGCGCACATCATAATCGAAGA    |
| <i>Ubtf-1a</i>  | F | GCCCTCACTAGCACCCTT       |
|                 | R | CCGCTTCTCCGTTTATTCTC     |
| <i>Ubtf-1b</i>  | F | AGAGCCGAGAAGGGAGCC       |
|                 | R | CCGCTTCTCCGTTTATTCTC     |
| <i>Ubtf-t</i>   | F | CCGCTGGTCCCAGGAAGATA     |
|                 | R | CGACTCTGTGGTTTTGA ACTTGG |
| <i>Tjp2-1a</i>  | F | CTGGGACCGTCGCTTTCTG      |
|                 | R | GCTCCCATATCACCTCCTCCA    |
| <i>Tjp2-1b</i>  | F | CAGCTTG TAGTTCTGAGCCGC   |
|                 | R | GCTCCCATATCACCTCCTCCA    |
| <i>Tjp2-t</i>   | F | ATGGGAGCAGTACACCGTGA     |
|                 | R | TGACCACCCTGTCATTTTCTTG   |
| <i>Pitx2-1a</i> | F | ACCCTCAAGATCCCCGCAG      |
|                 | R | AGAACGGCTGTCTCCCCGT      |
| <i>Pitx2-1b</i> | F | CTAACACGGGGACACTTGGC     |
|                 | R | CATGCAGTTCATGGACGAGG     |
| <i>Pitx2-t</i>  | F | ACCCCGGCTATTCGTACAAC     |
|                 | R | GAGGACAGGGGATTGACGTTC    |
| <i>Net1-1a</i>  | F | ATCGGTCTCCTGGGCACTG      |
|                 | R | ACCCTGCGGCTTCTCCTC       |
| <i>Net1-1b</i>  | F | TGCCCATTA AAAGGACGATCC   |
|                 | R | TTTGCCAAAGATGTGACCCG     |

|                    |   |                            |
|--------------------|---|----------------------------|
| <i>Net1-t</i>      | F | AGCTCGGGTCACATCTTTGG       |
|                    | R | CGGTGGACCTGCTGAATGA        |
| <i>Pdgfra-1a</i>   | F | GCTTGGGGCTTACTTTTCACTC     |
|                    | R | CAGAAAGACCTGGTGGGAGGT      |
| <i>Pdgfra-1b</i>   | F | AGGCAGCAAAGAGGCAAGAT       |
|                    | R | CAGAAAGACCTGGTGGGAGGT      |
| <i>Pdgfra-1c</i>   | F | GCTAGCGCGGAACCTCAGA        |
|                    | R | CAGAAAGACCTGGTGGGAGGT      |
| <i>Pdgfra-t</i>    | F | ACAATAACGGGAGGCTGGTG       |
|                    | R | AACTCGCTGGTCTTGAACGTC      |
| <i>Tjp1-e20 in</i> | F | GAAGGACCACCATTGCCG         |
|                    | R | CTGGGTGACCAAGAGCTGGT       |
| <i>Tjp1-e20 ex</i> | F | AGCCTCTCAACAGGTGTACAGGA    |
|                    | R | CTGGGTGACCAAGAGCTGGT       |
| <i>Tjp1-t</i>      | F | TTCCACCACCAGGCTTTACC       |
|                    | R | TAGCCGAGGGCAGGACTTC        |
| <i>Epb4115-1a</i>  | F | ACAATGGAGATAGGGCCAAAAG     |
|                    | R | CTACCCCAGCCAGGGACAC        |
| <i>Epb4115-1b</i>  | F | AAGAATGCAGGAGCCCATCA       |
|                    | R | GTTCCACGGCCTAAAAGGTGT      |
| <i>Epb4115-t</i>   | F | TGATGTCTCCTGTGCCTGTCAC     |
|                    | R | TTCCTGTCTGTGCTGCTCTGTC     |
| <i>Nf2-e16 in</i>  | F | TGAAACTCAAAGAGCGGGAGA      |
|                    | R | TGAGGACTCAAATGCAGATAGGTC   |
| <i>Nf2-e16 ex</i>  | F | CGAGCTCAAGACGGAGATCG       |
|                    | R | TGAGCTTTTAAATGGTATTATGCTTG |
| <i>Nf2-t</i>       | F | GCCTGGCTCAAAATGGACA        |
|                    | R | TCTCTTGAAGTAGCTCCTCCTCAG   |
| <i>Fgfr2-IIIb</i>  | F | GTGGAAAAGAACGGCAGTAAATAC   |
|                    | R | TTCCCAGCATCCATCTCC         |



|                   |   |                           |
|-------------------|---|---------------------------|
| <i>Fgfr2-IIIc</i> | F | GTGGAAAAGAACGGCAGTAAATAC  |
|                   | R | TTCCCCAGCATCCTCAAAAG      |
| <i>Fgfr2-t</i>    | F | GCCTCTCGAACAGTATTCTCCT    |
|                   | R | ACAGGGTTCATAAGGCATGGG     |
| <i>Rac1-e4 in</i> | F | GCCTATGGGACACAGCTGGA      |
|                   | R | TTGCCCTGGAGGGTCTATC       |
| <i>Rac1-e4 ex</i> | F | TGGAGAGTACATCCCCACCG      |
|                   | R | AGAACACGTCTGTCTGCGGG      |
| <i>Rac1-t</i>     | F | AAGTGGTATCCTGAAGTGCGACA   |
|                   | R | TGCGGGTAGGTGATGGGAG       |
| <i>Rbfox2-1a</i>  | F | CTCCCAAATAAACAGCCCTCC     |
|                   | R | CGGTCCCTTGGTCCTTCAGT      |
| <i>Rbfox2-1b</i>  | F | TTCCAAC TGGTTATCATCTGCTTC |
|                   | R | GAACGGGATGGTAGTAAAAGGCT   |
| <i>Rbfox2-t</i>   | F | CGCAATGGTTCAGCCTTTTAC     |
|                   | R | CCGTAGAGGGTCAGGTTATGTTC   |
| <i>Gapdh</i>      | F | CCCCAATGTGTCCGTCGTG       |
|                   | R | TGCCTGCTTCACCACCTTCT      |
